# Supplementary material for: BRR2a Affects Flowering Time via FLC Splicing
Source: PLOS journal article supplement (doi:10.1371/journal.pgen.1005924), 2016-04-21
Supplement: S2 (10.1371/journal.pgen.1005924.s002) [file journal.pgen.1005924.s002]

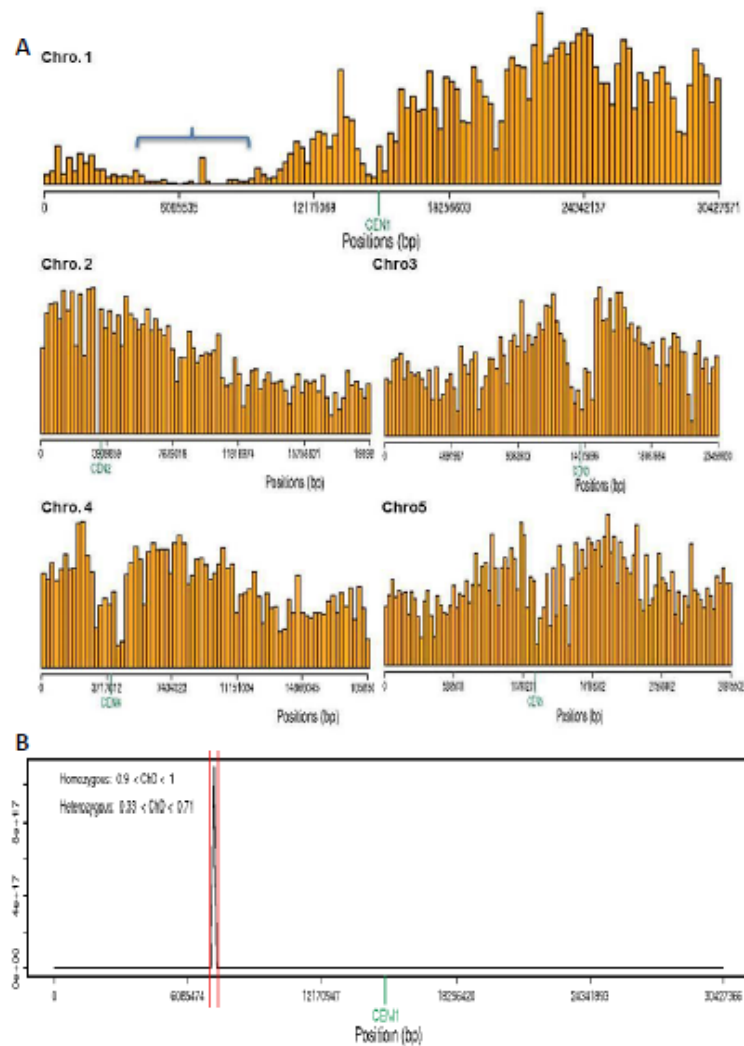

**S2 Figure. Genome-wide SNP frequencies in a *cää* F2 mapping population.** (A) SNPs frequencies in sequencing reads were plotted along each chromosome using a bin size of 250 kb. SNPs are caused by reads from the *Ler* accession, which was crossed with the *cää* mutant in Col. A non-recombinant region on the left arm of chromosome 1 with very few *Ler* reads is indicated by a brace. Chro., abbreviation for Chromosome. Histograms were generated by the Next-generation mapping tool (Austin et al., 2011). (B) SNP localization by the Next-Generation Mapping web application. Screenshot of the final stage of region selection and SNP annotation. The sharp delimited peak, at position 7307231 corresponds to the position of a mutation in *AT1G20960*.

Austin, R.S., Vidaurre, D., Stamatiou, G., Breit, R., Provar, N.J., Bonetta, D., Zhang, J., Fung, P., Gong, Y., Wang, P.W., McCourt, P. and Guttman, D.S. (2011) Next-generation mapping of Arabidopsis genes. *Plant J* **67**, 715-725.
