# Supplementary material for: BRR2a Affects Flowering Time via FLC Splicing
Source: PLOS journal article supplement (doi:10.1371/journal.pgen.1005924), 2016-04-21
Supplement: S6 (10.1371/journal.pgen.1005924.s006) [file journal.pgen.1005924.s006]

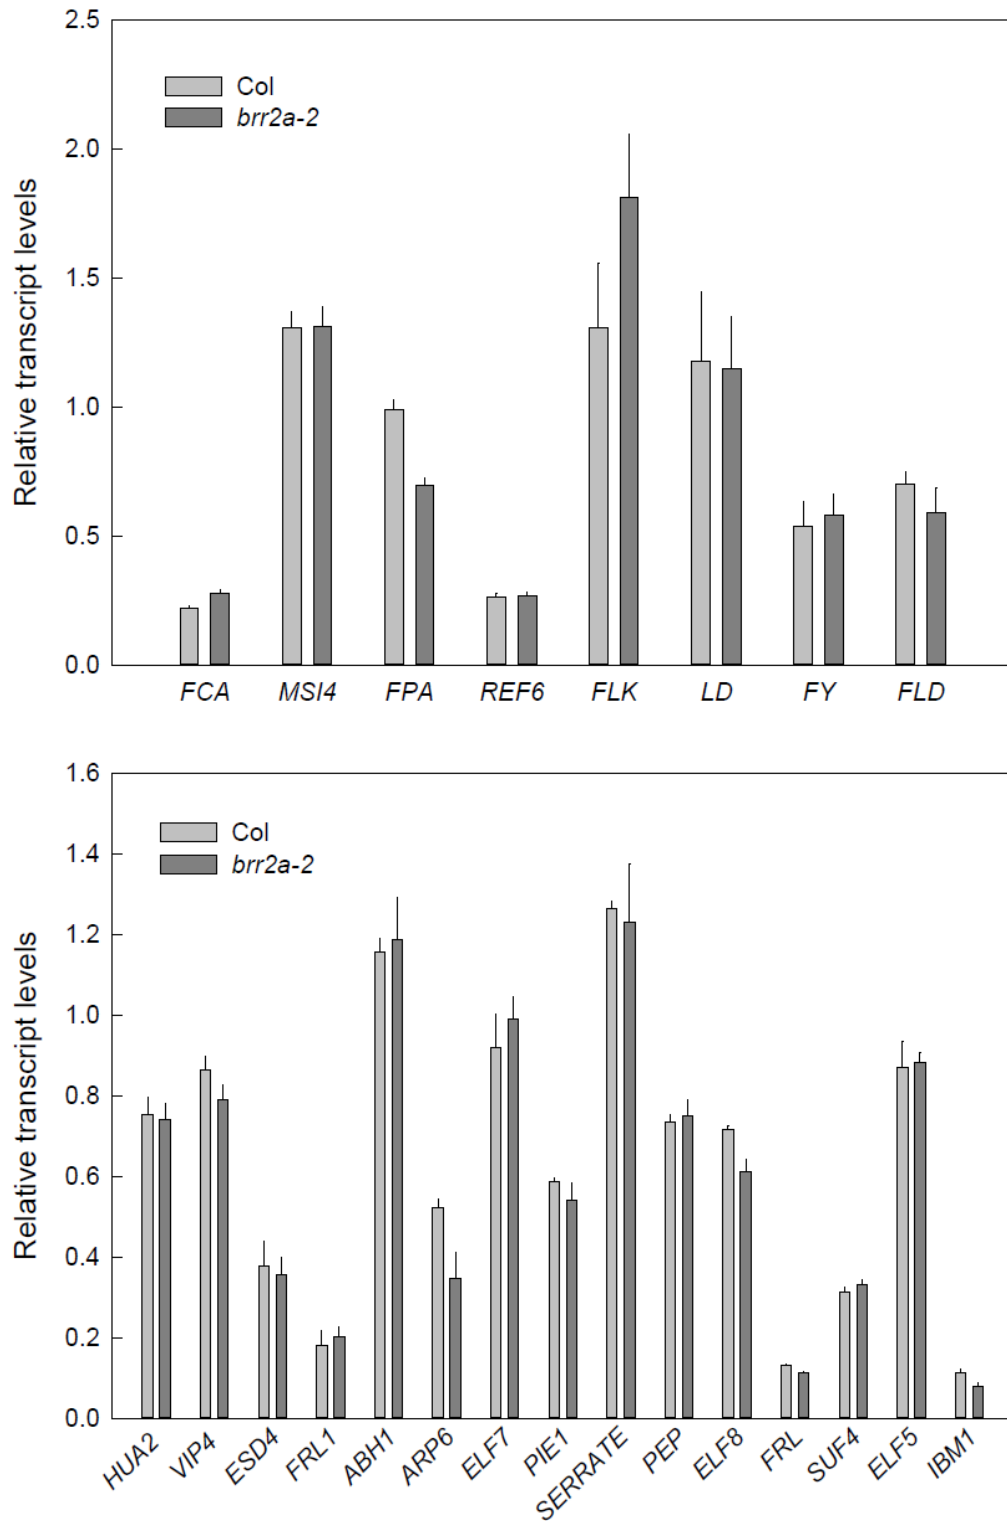

**S6 Figure. Expression of major *FLC* regulators was not altered in *brr2a-2*.** (A) Expression of eight *FLC* repressors. (B) Expression of fifteen *FLC* activators. Quantitative RT-PCR was performed using RNA extracted from 15 day-old seedlings grown under SD conditions at ZT = 7. Relative expression to *PP2a* is shown as mean  $\pm$  SE (n = 3).
